# Supplementary material for: Effects of Diagnostic Work‐Up on Medical Decision‐Making for Canine Urinary Tract Infection: An Observational Study in Danish Small Animal Practices
Source: PubMed Central journal article supplement — J Vet Intern Med. 2018 Feb 22;32(2):743–51. doi: 10.1111/jvim.15048 (PMC5867017; doi:10.1111/jvim.15048), 2018-02-22
Supplement: JVIM-32-743-s001.pdf [file JVIM-32-743-s001.pdf]

**Supplementary Table 1.** Predictors for performing microscopy and culture in dogs with suspected UTI (n=151)

| Predictor variable                                | n   | Microscopy performed |                   |              | Culture performed |                       |                   |
|---------------------------------------------------|-----|----------------------|-------------------|--------------|-------------------|-----------------------|-------------------|
|                                                   |     | OR                   | 95% CI            | P            | OR                | 95% CI                | P                 |
| Age                                               | 151 | 1.04                 | 0.91-1.21         | 0.55         | 0.96              | 0.85-1.08             | 0.50              |
| Sex (female)                                      | 151 | 1.77                 | 0.51-6.16         | 0.37         | 1.13              | 0.37-3.43             | 0.83              |
| Days with clinical signs*                         | 144 | <b>1.13</b>          | <b>1.01-1.26</b>  | <b>0.027</b> | 0.99              | 0.97-1.01             | 0.24              |
| Dysuria                                           | 151 | 1.97                 | 0.41-9.43         | 0.40         | 0.58              | 0.19-1.82             | 0.35              |
| Stranguria                                        | 151 | 0.33                 | 0.061-1.79        | 0.20         | 0.67              | 0.17-2.63             | 0.57              |
| Pollakiuria                                       | 151 | <b>3.75</b>          | <b>0.94-14.97</b> | <b>0.061</b> | <b>3.31</b>       | <b>0.98-11.22</b>     | <b>0.053</b>      |
| Hematuria                                         | 151 | 0.82                 | 0.25-2.67         | 0.75         | 0.49              | 0.19-1.31             | 0.16              |
| Malodourous urine                                 | 151 | 0.02                 | 0.00-9.47         | 0.21         | 6.55              | 0.09-503              | 0.40              |
| Periuria                                          | 151 | 1.02                 | 0.32-3.29         | 0.98         | 0.97              | 0.38-2.48             | 0.95              |
| Incontinence                                      | 151 | <b>0.25</b>          | <b>0.056-1.13</b> | <b>0.072</b> | 0.36              | 0.09-1.43             | 0.15              |
| Licking outer genitalia                           | 151 | <b>4.90</b>          | <b>0.98-24.59</b> | <b>0.053</b> | <b>3.03</b>       | <b>0.87-10.48</b>     | <b>0.080</b>      |
| Anorexia                                          | 151 | 0.08                 | 0.003-2.35        | 0.15         | 2.03              | 0.30-13.81            | 0.47              |
| Lethargy                                          | 151 | 0.98                 | 0.16-6.07         | 0.98         | 1.57              | 0.32-7.80             | 0.58              |
| Temperature > 39.3°C                              | 151 | <b>0.06</b>          | <b>0.003-1.38</b> | <b>0.078</b> | 7.25              | 0.27-193              | 0.24              |
| Pain in back or abdomen                           | 151 | 1.30                 | 0.23-7.46         | 0.77         | 1.06              | 0.24-4.73             | 0.94              |
| US – blood positive                               | 150 | 0.48                 | 0.14-1.66         | 0.25         | 1.87              | 0.69-5.05             | 0.22              |
| US – protein positive                             | 149 | 0.90                 | 0.26-3.15         | 0.87         | 0.79              | 0.29-2.18             | 0.65              |
| USG ≤ 1.015                                       | 134 | 2.69                 | 0.40-17.97        | 0.31         | 1.20              | 0.35-4.10             | 0.78              |
| Microscopy performed                              | 151 | -                    | -                 | -            | 0.51              | 0.13-2.06             | 0.35              |
| Microscopy not performed (reference) <sup>#</sup> | 151 | -                    | -                 | -            | 1                 | -                     | -                 |
| Bacteriuria or pyuria <sup>#</sup>                | 151 | -                    | -                 | -            | 0.68              | 0.14-3.43             | 0.64              |
| Inactive sediment <sup>#</sup>                    | 151 | -                    | -                 | -            | 0.44              | 0.10-1.89             | 0.27              |
| Complicated UTI                                   | 149 | 0.78                 | 0.15-4.15         | 0.77         | 3.43              | 0.61-19.33            | 0.16              |
| Culture available                                 | 151 | 0.25                 | 0.030-2.155       | 0.21         | 5.12 <sup>^</sup> | 0.03-782 <sup>^</sup> | 0.52 <sup>^</sup> |

Individual logistic regression analysis with practice as a random effect.

n; number of cases, OR; Odds Ratio, CI; Confidence interval, US; Urine Stick, USG; Urine Specific Gravity, UTI; Urinary Tract Infection.

\*Number of days with clinical signs before the consultation.

#Negative or active sediment in microscopy compared to not performing microscopy.

^ In-house culture availability as predictor for external culture.
